# Supplementary material for: Chemical Constituents from the Rhizomes of Smilax glabra and Their Antimicrobial Activity
Source: Molecules. 2013 May 8;18(5):5265–87. doi: 10.3390/molecules18055265 (PMC6270451; doi:10.3390/molecules18055265)
Supplement: Supplementary file 1 [file molecules-18-05265-s001.pdf]

# Supplementary Materials

## 1. Spectroscopic Data of the Known Compounds

*Taxifolin (7)*. Pale yellow needles;  $[\alpha]_D^{20} +42.5$  ( $c$  1.30, acetone);  $^1\text{H-NMR}$  (400 MHz,  $\text{CD}_3\text{OD}$ )  $\delta$ : 6.95 (1H, d,  $J = 1.2$  Hz, H-2'), 6.83 (1H, dd,  $J = 8.0, 1.6$  Hz, H-6'), 6.79 (1H, d,  $J = 8.0$  Hz, H-5'), 5.87 (2H, s, H-6, 8), 4.90 (1H, d,  $J = 11.6$  Hz, H-2), 4.49 (1H, d,  $J = 11.5$  Hz, H-3);  $^{13}\text{C-NMR}$  (100 MHz,  $\text{CD}_3\text{OD}$ )  $\delta$ : 198.4 (C-4), 168.8 (C-7), 165.3 (C-5), 164.5 (C-9), 147.1 (C-4'), 146.3 (C-3'), 129.9 (C-1'), 120.9 (C-6'), 116.1 (C-2'), 115.9 (C-5'), 101.8 (C-10), 97.3 (C-6), 96.3 (C-8), 85.1 (C-2), 73.7 (C-3).

*Naringenin (8)*. Pale yellow needles;  $^1\text{H-NMR}$  (400 MHz,  $\text{DMSO}-d_6$ )  $\delta$ : 7.30 (2H, d,  $J = 8.0$  Hz, H-2', 6'), 6.78 (2H, d,  $J = 8.0$  Hz, H-3', 5'), 5.87 (1H, s, H-6, 8), 5.43 (1H, dd,  $J = 12.4, 2.9$  Hz, H-2), 3.28 (1H, dd,  $J = 13.2, 16.8$  Hz, H-3b), 2.67 (1H, dd,  $J = 16.8, 2.9$  Hz, H-3a);  $^{13}\text{C-NMR}$  (100 MHz,  $\text{DMSO}-d_6$ )  $\delta$ : 196.4 (C-4), 166.6 (C-7), 163.4 (C-5), 162.9 (C-9), 157.7 (C-4'), 128.8 (C-1'), 128.3 (C-2', 6'), 115.1 (C-3', 5'), 101.7 (C-10), 95.7 (C-6), 94.9 (C-8), 78.4 (C-2), 41.9 (C-3).

*Dihydrokaempferol (9)*. White powder;  $[\alpha]_D^{20} +22.8$  ( $c$  1.32, MeOH);  $^1\text{H-NMR}$  (400 MHz,  $\text{DMSO}-d_6$ )  $\delta$ : 11.89, 10.80, 9.53 (each 1H, s, OH), 7.30 (2H, d,  $J = 8.0$  Hz, H-2', 6'), 6.77 (2H, d,  $J = 7.6$  Hz, H-3', 5'), 5.90 (1H, d,  $J = 2.0$  Hz, H-8), 5.85 (1H, d,  $J = 2.0$  Hz, H-6), 5.74 (1H, d,  $J = 4.4$  Hz, 3-OH), 5.04 (1H, d,  $J = 11.6$  Hz, H-2), 4.57 (1H, dd,  $J = 10.4, 6.0$  Hz, H-3);  $^{13}\text{C-NMR}$  (100 MHz,  $\text{DMSO}-d_6$ )  $\delta$ : 197.9 (C-4), 166.7 (C-7), 163.3 (C-5), 162.6 (C-9), 157.7 (C-4'), 129.4 (C-2', 6'), 127.5 (C-1'), 114.9 (C-3', 5'), 100.5 (C-10), 96.0 (C-6), 95.0 (C-8), 82.9 (C-2), 71.4 (C-3).

*Sakuranetin (10)*. Pale yellow solid;  $[\alpha]_D^{20} -7$  ( $c$  0.5, MeOH);  $^1\text{H-NMR}$  (600 MHz,  $\text{CD}_3\text{OD}$ )  $\delta$ : 7.31 (2H, d,  $J = 8.4$  Hz, H-2', 6'), 6.82 (2H, d,  $J = 8.4$  Hz, H-3', 5'), 6.06 (1H, d,  $J = 2.4$  Hz, H-8), 5.89 (1H, s, H-6), 5.34 (1H, dd,  $J = 12.6, 3.0$  Hz, H-2), 3.91 (3H, s, 7-OCH<sub>3</sub>), 3.11 (1H, dd,  $J = 17.4, 13.2$  Hz, H-3b), 2.70 (1H, dd,  $J = 16.8, 3.0$  Hz, H-3a);  $^{13}\text{C-NMR}$  (150 MHz,  $\text{CD}_3\text{OD}$ )  $\delta$ : 197.9 (C-4), 168.8 (C-7), 165.7 (C-5), 165.1 (C-9), 159.2 (C-4'), 131.3 (C-1'), 129.2 (C-2', 6'), 116.5 (C-3', 5'), 103.5 (C-10), 96.4 (C-6), 93.9 (C-8), 80.7 (C-2), 57.1 (7-OCH<sub>3</sub>), 44.2 (C-3).

*Isoastilbin (11)*. White powder;  $[\alpha]_D^{20} -144.6$  ( $c$  0.87, MeOH); ESIMS ( $m/z$ ): 449  $[\text{M}-\text{H}]^-$ , 473  $[\text{M}+\text{Na}]^+$ ; CD ( $6.35 \times 10^{-5}$  MeOH):  $\Delta\epsilon$  (nm) +5.89 (342), -14.79 (300);  $^1\text{H-NMR}$  (500 MHz,  $\text{C}_5\text{D}_5\text{N}$ )  $\delta$ : 7.66 (1H, d,  $J = 1.5$  Hz, H-2'), 7.30 (1H, dd,  $J = 8.0, 2.0$  Hz, H-6'), 7.25 (1H, d,  $J = 8.5$  Hz, H-5'), 6.40 (1H, d,  $J = 2.0$  Hz, H-6), 6.39 (1H, d,  $J = 2.0$  Hz, H-8), 5.88 (1H, d,  $J = 1.5$  Hz, H-2), 5.81 (1H, d,  $J = 2.5$  Hz, H-3), 4.91 (1H, d,  $J = 2.5$  Hz, H-1''), 4.51 (1H, br. s, H-2''), 4.37 (1H, dd,  $J = 9.5, 3.5$  Hz, H-5''), 4.14 (1H, m, H-3''), 3.41 (1H, m, H-4''), 1.45 (3H, d,  $J = 6.0$  Hz, H-6'');  $^{13}\text{C-NMR}$  (125 MHz,  $\text{C}_5\text{D}_5\text{N}$ )  $\delta$ : 194.2 (C-4), 168.9 (C-7), 165.6 (C-5), 163.7 (C-9), 147.6 (C-4'), 147.4 (C-3'), 127.6 (C-1'), 118.9 (C-6'), 116.4 (C-5'), 115.5 (C-2'), 101.5 (C-1''), 100.6 (C-10), 97.5 (C-6), 96.4 (C-8), 81.7 (C-2), 74.4 (C-3), 73.2 (C-4''), 72.4 (C-3''), 71.9 (C-2''), 70.4 (C-5''), 18.4 (C-6'').

*Astilbin (12)*. White powder;  $[\alpha]_D^{20} -13.5$  ( $c$  0.76, MeOH); ESIMS ( $m/z$ ): 449  $[\text{M}-\text{H}]^-$ , 473  $[\text{M}+\text{Na}]^+$ ; CD ( $3.98 \times 10^{-5}$  MeOH):  $\Delta\epsilon$  (nm) +5.89-15.46 (294), +5.66 (330);  $^1\text{H-NMR}$  (500 MHz,  $\text{CD}_3\text{OD}$ )  $\delta$ : 6.95 (1H, d,  $J = 2.0$  Hz, H-2'), 6.82 (1H, dd,  $J = 8.5, 2.0$  Hz, H-6'), 6.80 (1H, d,  $J = 8.0$  Hz, H-5'), 5.91 (1H, d,  $J = 2.5$  Hz, H-6), 5.89 (1H, d,  $J = 2.5$  Hz, H-8), 5.07 (1H, d,  $J = 10.5$  Hz, H-2), 4.55 (1H, d,

$J = 10.5$  Hz, H-3), 4.24 (1H, dq,  $J = 10.0, 6.5$  Hz, H-5''), 4.04 (1H, s, H-1''), 3.65 (1H, dd,  $J = 9.5, 3.5$  Hz, H-3''), 3.53 (1H, br. s, H-2''), 3.31 (1H, dd,  $J = 9.6, 9.6$  Hz, H-4''), 1.17 (1H, d,  $J = 6.0$  Hz, H-6'');  $^{13}\text{C}$ -NMR (125 MHz,  $\text{CD}_3\text{OD}$ )  $\delta$ : 196.0 (C-4), 168.6 (C-7), 165.5 (C-5), 164.1 (C-9), 147.4 (C-4'), 146.6 (C-3'), 129.2 (C-1'), 120.5 (C-6'), 116.3 (C-5'), 115.5 (C-2'), 102.5 (C-1''), 102.2 (C-10), 97.4 (C-6), 96.3 (C-8), 83.9 (C-2), 78.6 (C-3), 73.8 (C-4''), 72.2 (C-3''), 71.8 (C-2''), 70.5 (C-5''), 17.9 (C-6'').

**Neoastilbin (13).** White solid;  $[\alpha]_{\text{D}}^{20} -85.6$  ( $c$  0.85, MeOH); CD ( $2.05 \times 10^{-5}$  MeOH):  $\Delta\epsilon$  (nm) +0.76 (297), -1.43 (330);  $^1\text{H}$ -NMR (600 MHz,  $\text{CD}_3\text{OD}$ )  $\delta$ : 6.97 (1H, s, H-2'), 6.80 (2H, s, H-5', 6'), 5.92 (1H, d,  $J = 2.4$  Hz, H-6), 5.89 (1H, d,  $J = 2.4$  Hz, H-8), 5.16 (1H, s, H-2), 4.99 (1H, s, H-1'), 4.64 (1H, d,  $J = 11.4$  Hz, H-3), 4.00 (1H, s, H-2''), 3.38 (1H, dd,  $J = 9.6, 3.0$  Hz, H-3''), 3.20 (1H, t, H-4''), 2.31 (1H, m, H-5''), 0.90 (3H, d,  $J = 6.0$  Hz, H-6'');  $^{13}\text{C}$ -NMR (150 MHz,  $\text{CD}_3\text{OD}$ )  $\delta$ : 197.9 (C-4), 168.9 (C-7), 165.7 (C-5), 164.5 (C-9), 147.6 (C-4'), 146.8 (C-3'), 130.2 (C-1'), 121.2 (C-6'), 116.5 (C-5'), 115.7 (C-2'), 103.0 (C-1''), 102.3 (C-10), 97.6 (C-6), 96.5 (C-8), 83.9 (C-2), 77.1 (C-3), 73.6 (C-4''), 72.1 (C-3''), 72.1 (C-2''), 70.5 (C-5''), 18.1 (C-6'').

**Neoisostilbin (14).** White solid; ESIMS ( $m/z$ ): 449  $[\text{M}-\text{H}]^-$ , 473  $[\text{M}+\text{Na}]^+$ ; CD ( $5.05 \times 10^{-5}$  MeOH):  $\Delta\epsilon$  (nm) +2.47 (297), -1.49 (340);  $^1\text{H}$ -NMR (500 MHz,  $\text{CD}_3\text{OD}$ )  $\delta$ : 6.99 (1H, d,  $J = 2.0$  Hz, H-2'), 6.84 (1H, dd,  $J = 6.0, 2.0$  Hz, H-6'), 6.79 (1H, d,  $J = 8.5$  Hz, H-5'), 5.95 (1H, d,  $J = 2.5$  Hz, H-6), 5.92 (1H, d,  $J = 2.5$  Hz, H-8), 5.32 (1H, d,  $J = 1.5$  Hz, H-2), 4.23 (1H, d,  $J = 1.5$  Hz, H-1'), 4.06 (1H, d,  $J = 2.0$  Hz, H-3), 3.59 (1H, s, H-2''), 3.49 (1H, dq,  $J = 9.0, 6.5$  Hz, H-5''), 3.34 (1H, s, H-3''), 3.26 (1H, s, H-4''), 1.13 (3H, d,  $J = 6.5$  Hz, H-6'');  $^{13}\text{C}$ -NMR (125 MHz,  $\text{CD}_3\text{OD}$ )  $\delta$ : 193.9 (C-4), 168.7 (C-7), 166.0 (C-5), 164.5 (C-9), 146.7 (C-4'), 146.3 (C-3'), 128.5 (C-1'), 119.4 (C-6'), 116.1 (C-5'), 115.3 (C-2'), 102.6 (C-1''), 102.1 (C-10), 97.2 (C-6), 96.0 (C-8), 82.3 (C-2), 78.4 (C-3), 73.7 (C-4''), 72.0 (C-3''), 71.6 (C-2''), 70.6 (C-5''), 17.5 (C-6'').

**Engeletin (15).** Yellow powder;  $[\alpha]_{\text{D}}^{20} -14.2$  ( $c$  0.32, MeOH);  $^1\text{H}$ -NMR (500 MHz,  $\text{CD}_3\text{OD}$ )  $\delta$ : 7.35 (2H, br. d,  $J = 8.5$  Hz, H-2', 6'), 6.83 (2H, br. d,  $J = 8.5$  Hz, H-3', 5'), 5.91 (1H, d,  $J = 2.5$  Hz, H-8), 5.89 (1H, d,  $J = 2.5$  Hz, H-6), 5.15 (1H, d,  $J = 9.5$  Hz, H-2), 4.60 (1H, d,  $J = 11.0$  Hz, H-3), 4.00 (1H, d,  $J = 1.5$  Hz, H-1'), 3.64 (1H, dd,  $J = 3.0, 1.5$  Hz, H-2''), 3.49 (1H, dd,  $J = 9.5, 3.0$  Hz, H-3''), 3.29 (1H, m, H-4''), 2.25 (1H, m, H-5''), 1.17 (3H, d,  $J = 6.5$  Hz, H-6'');  $^{13}\text{C}$ -NMR (125 MHz,  $\text{CD}_3\text{OD}$ )  $\delta$ : 196.0 (C-4), 168.7 (C-7), 165.5 (C-5), 164.1 (C-9), 159.5 (C-4'), 130.2 (C-2', 6'), 128.6 (C-1'), 116.4 (C-3', 5'), 102.5 (C-1''), 102.2 (C-10), 97.4 (C-8), 96.3 (C-6), 83.9 (C-2), 78.7 (C-3), 73.8 (C-4''), 72.2 (C-3''), 70.5 (C-5''), 18.0 (C-6'').

**Arthromerin B (16).** Pale yellow powder;  $[\alpha]_{\text{D}}^{20} +28.3$  ( $c$  0.90, MeOH); CD ( $2.16 \times 10^{-5}$  MeOH):  $\Delta\epsilon$  (nm) -19.41 (291), +3.99 (330);  $^1\text{H}$ -NMR (500 MHz,  $\text{CD}_3\text{OD}$ )  $\delta$ : 7.35 (2H, d,  $J = 8.5$  Hz, H-2', 6'), 6.78 (2H, d,  $J = 8.5$  Hz, H-3', 5'), 5.92 (1H, d,  $J = 2.0$  Hz, H-8), 5.89 (1H, d,  $J = 1.5$  Hz, H-6), 5.18 (1H, d,  $J = 11.0$  Hz, H-2), 4.84 (1H, d,  $J = 8.5$  Hz, H-3), 4.70 (1H, d,  $J = 7.4$  Hz, H-1'), 3.89 (1H, dd,  $J = 12.0, 2.4$  Hz, H-6''b), 3.76 (1H, dd,  $J = 12.0, 6.0$  Hz, H-6''a), 3.55 (1H, m, H-2''), 3.52 (1H, m, H-5''), 3.35 (1H, m, H-3''), 3.29 (1H, m, H-4'');  $^{13}\text{C}$ -NMR (125 MHz,  $\text{CD}_3\text{OD}$ )  $\delta$ : 196.3 (C-4), 169.2 (C-7), 165.5 (C-5), 164.4 (C-9), 159.5 (C-4'), 130.3 (C-2', 6'), 128.4 (C-1'), 116.4 (C-3', 5'), 102.4

(C-1''), 101.5 (C-10), 97.4 (C-8), 96.4 (C-6), 83.7 (C-2), 77.6 (C-5''), 76.4 (C-3), 73.1 (C-3''), 71.1 (C-2''), 66.9 (C-4''), 63.5 (C-6'').

*Sinensin* (**17**). Yellow solid; CD ( $2.10 \times 10^{-5}$  MeOH):  $\Delta\epsilon$  (nm) -4.58 (298), +1.17 (336); ESIMS ( $m/z$ ): 449 [M-H]<sup>-</sup>, 473 [M+Na]<sup>+</sup>; <sup>1</sup>H-NMR (600 MHz, CD<sub>3</sub>OD)  $\delta$ : 7.35 (2H, d,  $J$  = 8.4 Hz, H-2', 6'), 6.83 (2H, d,  $J$  = 8.5 Hz, H-3', 5'), 6.47 (1H, d,  $J$  = 2.4 Hz, H-8), 6.09 (1H, d,  $J$  = 1.8 Hz, H-6), 4.87 (1H, d,  $J$  = 11.4 Hz, H-2), 4.39 (1H, d,  $J$  = 11.4 Hz, H-3), 4.80 (1H, d,  $J$  = 7.4 Hz, H-1''), 3.94 (1H, dd,  $J$  = 12.0, 1.8 Hz, H-6''b), 3.76 (1H, dd,  $J$  = 12.0, 5.4 Hz, H-6''a), 3.45-3.58 (4H, m, H-2''-5''); <sup>13</sup>C-NMR (150 MHz, CD<sub>3</sub>OD)  $\delta$ : 193.9 (C-4), 167.5 (C-5), 166.1 (C-9), 162.2 (C-7), 159.4 (C-4'), 130.5 (C-2', 6'), 129.5 (C-1'), 116.3 (C-3', 5'), 105.1 (C-1''), 104.4 (C-10), 100.2 (C-8), 99.3 (C-6), 84.5 (C-2), 78.8 (C-5''), 77.6 (C-3), 74.8 (C-3''), 71.4 (C-2''), 67.0 (C-4''), 62.7 (C-6'').

(2*R*, 3*R*)-*Taxifolin 3'-O-β-D-glucopyranoside* (**18**). Pale yellow solid; CD ( $2.20 \times 10^{-5}$  MeOH):  $\Delta\epsilon$  (nm) -4.89 (292), +0.45 (326); <sup>1</sup>H-NMR (600 MHz, CD<sub>3</sub>OD)  $\delta$ : 7.38 (1H, d,  $J$  = 1.8 Hz, H-2'), 7.10 (1H, dd,  $J$  = 8.4, 2.4 Hz, H-6'), 6.90 (1H, d,  $J$  = 7.8 Hz, H-5'), 5.93 (1H, d,  $J$  = 2.4 Hz, H-6), 5.89 (1H, d,  $J$  = 2.4 Hz, H-8), 4.98 (1H, d,  $J$  = 11.4 Hz, H-2), 4.83 (1H, d,  $J$  = 7.4 Hz, H-1''), 4.57 (1H, d,  $J$  = 11.4 Hz, H-3), 3.89 (1H, dd,  $J$  = 12.0, 2.4 Hz, H-6''), 3.68 (1H, dd,  $J$  = 12.0, 6.0 Hz, H-2''), 3.64 (1H, s, H-5''), 3.51 (1H, dd,  $J$  = 9.6, 10.2 Hz, H-3''), 3.43 (1H, m, H-4''); <sup>13</sup>C-NMR (150 MHz, CD<sub>3</sub>OD)  $\delta$ : 198.8 (C-4), 168.7 (C-7), 164.8 (C-5), 164.0 (C-9), 149.3 (C-4'), 146.9 (C-3'), 129.7 (C-1'), 124.9 (C-6'), 118.5 (C-2'), 117.1 (C-5'), 104.3 (C-1''), 101.2 (C-10), 97.6 (C-6), 96.5 (C-8), 85.1 (C-2), 78.6 (C-5''), 77.9 (C-3''), 75.1 (C-2''), 73.7 (C-3), 71.7 (C-4''), 62.8 (C-6'').

(2*S*, 3*S*)-*Glucodistylin* (**19**). Pale yellow solid; CD ( $3.62 \times 10^{-5}$  MeOH):  $\Delta\epsilon$  (nm) +1.51 (295), -3.24 (327); <sup>1</sup>H-NMR (600 MHz, CD<sub>3</sub>OD)  $\delta$ : 6.95 (1H, d,  $J$  = 1.8 Hz, H-2'), 6.79 (1H, dd,  $J$  = 8.0, 1.8 Hz, H-6'), 6.75 (1H, d,  $J$  = 8.4 Hz, H-5'), 5.90 (1H, d,  $J$  = 1.2 Hz, H-6), 5.89 (1H, d,  $J$  = 1.8 Hz, H-8), 5.26 (1H, d,  $J$  = 9.0 Hz, H-2), 4.90 (1H, d,  $J$  = 7.4 Hz, H-1''), 4.68 (1H, d,  $J$  = 7.8 Hz, H-3), 3.80 (1H, dd,  $J$  = 12.0, 2.4 Hz, H-6''b), 3.70 (1H, dd,  $J$  = 12.0, 6.0 Hz, H-6''a), 3.43 (1H, m, H-2''), 3.35 (1H, s, H-5''), 3.19 (1H, m, H-3''), 3.13 (1H, m, H-4''); <sup>13</sup>C-NMR (150 MHz, CD<sub>3</sub>OD)  $\delta$ : 195.9 (C-4), 170.1 (C-7), 166.9 (C-5), 165.9 (C-9), 147.5 (C-3'), 146.3 (C-3'), 129.3 (C-1'), 121.3 (C-6'), 116.4 (C-2'), 116.2 (C-5'), 104.8 (C-1''), 102.7 (C-10), 97.7 (C-6), 96.5 (C-8), 83.7 (C-2), 78.1 (C-5''), 77.9 (C-3''), 75.6 (C-2''), 72.5 (C-3), 71.7 (C-4''), 63.1 (C-6'').

(-)-*Epicatechin* (**20**). White powder;  $[\alpha]_D^{20}$  -70.50 ( $c$  0.20, MeOH); <sup>1</sup>H-NMR (400 MHz, DMSO-*d*<sub>6</sub>)  $\delta$ : 6.88 (1H, s, H-2'), 6.65 (1H, d,  $J$  = 8.0 Hz, H-6'), 6.64 (1H, d,  $J$  = 8.0 Hz, H-5'), 5.88 (1H, d,  $J$  = 2.4 Hz, H-8), 5.70 (1H, d,  $J$  = 2.0 Hz, H-6), 4.64 (1H, s, H-2), 3.98 (1H, m, H-3), 2.67 (1H, dd,  $J$  = 16.4, 4.4 Hz, H-4a), 2.44 (1H, dd,  $J$  = 16.4, 3.6 Hz, H-4b); <sup>13</sup>C-NMR (100 MHz, DMSO-*d*<sub>6</sub>)  $\delta$ : 156.9 (C-9), 156.7 (C-7), 156.2 (C-5), 144.9 (C-3'), 144.8 (C-4'), 131.0 (C-1'), 118.4 (C-6'), 115.3 (C-5'), 115.2 (C-2'), 98.9 (C-10), 95.5 (C-6), 94.5 (C-8), 78.5 (C-2), 65.3 (C-3), 28.6 (C-4).

(+)-*Catechin* (**21**). White powder;  $[\alpha]_D^{20}$  +25.5 ( $c$  0.08, MeOH); <sup>1</sup>H-NMR (400 MHz, DMSO-*d*<sub>6</sub>)  $\delta$ : 6.70 (1H, d,  $J$  = 2.0 Hz, H-2'), 6.67 (1H, dd,  $J$  = 8.0, 1.6 Hz, H-6'), 6.58 (1H, d,  $J$  = 6.4 Hz, H-5'), 5.87 (1H, d,  $J$  = 2.0 Hz, H-8), 5.67 (1H, d,  $J$  = 2.0 Hz, H-6), 4.46 (1H, d,  $J$  = 7.6 Hz, H-2), 3.79 (1H, m, H-3), 2.64 (1H, dd,  $J$  = 16.0, 5.2 Hz, H-4a), 2.33 (1H, dd,  $J$  = 16.4, 7.6 Hz, H-4b); <sup>13</sup>C-NMR (100

MHz, DMSO- $d_6$ )  $\delta$ : 156.4 (C-7), 156.1 (C-5), 155.3 (C-9), 144.8 (C-3', 4'), 130.6 (C-1'), 118.4 (C-6'), 115.0 (C-5'), 114.5 (C-2'), 99.0 (C-10), 95.1 (C-6), 93.8 (C-8), 81.0 (C-2), 66.3 (C-3), 27.8 (C-4).

*Cinchonain Ib* (**22**). Pale yellow solid; CD ( $6.20 \times 10^{-4}$  MeOH):  $\Delta\epsilon$  (nm) +7.12 (232); ESIMS ( $m/z$ ): 451 [M-H]<sup>-</sup>, 488 [M+Na]<sup>+</sup>; <sup>1</sup>H-NMR (600 MHz, CD<sub>3</sub>OD)  $\delta$ : 6.83 (1H, d,  $J$  = 1.8 Hz, H-2'), 6.69 (1H, d,  $J$  = 7.8 Hz, H-5''), 6.67 (1H, dd,  $J$  = 8.0, 2.0 Hz, H-6'), 6.63 (1H, d,  $J$  = 8.0 Hz, H-5'), 6.61 (1H, d,  $J$  = 1.8 Hz, H-2''), 6.54 (1H, dd,  $J$  = 8.2, 2.0 Hz, H-6''), 6.21 (1H, s, H-6), 4.98 (1H, s, H-2), 4.46 (1H, br. d,  $J$  = 5.4 Hz, H-7''), 4.21 (1H, m, H-3), 3.01 (1H, dd,  $J$  = 15.6, 7.2 Hz, H-8''a), 2.94 (1H, dd,  $J$  = 16.8, 4.2 Hz, H-4a), 2.87 (1H, dd,  $J$  = 16.2, 1.8 Hz, H-8''b), 2.83 (1H, dd,  $J$  = 17.4, 2.4 Hz, H-4b); <sup>13</sup>C-NMR (150 MHz, CD<sub>3</sub>OD)  $\delta$ : 170.7 (C-9''), 157.3 (C-5), 153.5 (C-9), 152.0 (C-7), 146.4 (C-3''), 145.9 (C-4'), 145.8 (C-4''), 145.3 (C-3'), 135.3 (C-1''), 131.7 (C-1'), 119.4 (C-6'), 119.3 (C-6''), 116.5 (C-5''), 115.9 (C-5'), 115.3 (C-2''), 115.0 (C-2'), 106.2 (C-8), 105.3 (C-10), 96.4 (C-6), 79.9 (C-2), 67.0 (C-3), 38.3 (C-8''), 35.2 (C-7''), 29.3 (C-4).

*Cinchonain Ia* (**23**). Pale yellow solid; CD ( $3.5 \times 10^{-4}$  MeOH):  $\Delta\epsilon$ (nm) -12.48 (235); ESIMS ( $m/z$ ): 451 [M-H]<sup>-</sup>, <sup>1</sup>H-NMR (600 MHz, CD<sub>3</sub>OD)  $\delta$ : 6.97 (1H, d,  $J$  = 1.8 Hz, H-2'), 6.78 (1H, dd,  $J$  = 8.0, 1.8 Hz, H-6'), 6.77 (1H, d,  $J$  = 8.0 Hz, H-5'), 6.61 (1H, d,  $J$  = 8.2 Hz, H-6''), 6.52 (1H, d,  $J$  = 1.8 Hz, H-2''), 6.45 (1H, dd,  $J$  = 7.8, 1.8 Hz, H-5''), 6.21 (1H, s, H-6), 4.87 (1H, s, H-2), 4.55 (1H, br. d,  $J$  = 6.0 Hz, H-7''), 4.25 (1H, m, H-3), 3.07 (1H, dd,  $J$  = 15.6, 7.2 Hz, H-8''a), 2.91 (1H, dd,  $J$  = 16.8, 4.2 Hz, H-4a), 2.87 (1H, dd,  $J$  = 15.6, 2.0 Hz, H-8''b), 2.84 (1H, dd,  $J$  = 16.8, 2.0 Hz, H-4b); <sup>13</sup>C-NMR (150 MHz, CD<sub>3</sub>OD)  $\delta$ : 170.7 (C-9''), 157.3 (C-5), 153.4 (C-9), 152.1 (C-7), 146.3 (C-3''), 146.0 (C-4'), 145.8 (C-4''), 145.1 (C-3'), 135.4 (C-1''), 131.9 (C-1'), 119.2 (C-6'), 119.2 (C-6''), 116.5 (C-5''), 116.0 (C-5'), 115.1 (C-2''), 115.1 (C-2'), 106.0 (C-8), 105.2 (C-10), 96.2 (C-6), 79.7 (C-2), 66.6 (C-3), 38.6 (C-8''), 35.4 (C-7''), 29.5 (C-4).

*Apigenin* (**24**). Yellow powder; ESIMS ( $m/z$ ): 269 [M-H]<sup>-</sup>, 271 [M+H]<sup>+</sup>; <sup>1</sup>H-NMR (500 MHz, DMSO- $d_6$ )  $\delta$ : 10.03 (1H, s, 4'-OH), 7.73 (2H, d,  $J$  = 8.5 Hz, H-2', 6'), 6.84 (2H, d,  $J$  = 8.5 Hz, H-3', 5'), 6.77 (1H, s, H-3), 6.51 (1H, d,  $J$  = 2.0 Hz, H-8), 6.16 (1H, d,  $J$  = 2.0 Hz, H-6); <sup>13</sup>C-NMR (125 MHz, DMSO- $d_6$ )  $\delta$ : 179.0 (C-4), 167.5 (C-2), 167.1 (C-7), 163.7 (C-5), 163.0 (C-4'), 158.7 (C-9), 132.7 (C-2', 6'), 123.3 (C-1'), 115.9 (C-3', 5'), 105.1 (C-10), 104.3 (C-3), 97.7 (C-6), 93.9 (C-8).

*Quercetin* (**25**). Yellow powder; <sup>1</sup>H-NMR (600 MHz, DMSO- $d_6$ )  $\delta$ : 12.48 (s, 1H, C5-OH), 10.78 (s, 1H, C7-OH), 9.58 (s, 1H, C4'-OH), 9.35 (s, 1H, 3-OH), 9.29 (s, 1H, C3'-OH), 7.66 (1H, d,  $J$  = 1.2 Hz, H-2'), 7.53 (1H, dd,  $J$  = 8.4, 1.8 Hz, H-6'), 6.87 (1H, d,  $J$  = 8.4 Hz, H-5'), 6.39 (1H, d,  $J$  = 1.8 Hz, H-8), 6.17 (1H, d,  $J$  = 1.8 Hz, H-6); <sup>13</sup>C-NMR (150 MHz, DMSO- $d_6$ )  $\delta$ : 175.8 (C-4), 163.9 (C-7), 160.7 (C-5), 156.1 (C-9), 147.7 (C-4'), 146.8 (C-2), 145.0 (C-3'), 135.7 (C-3), 121.9 (C-1'), 119.9 (C-6'), 115.6 (C-5'), 115.0 (C-2'), 102.9 (C-10), 98.2 (C-6), 93.3 (C-8).

*Luteolin* (**26**). Yellow powder; ESIMS ( $m/z$ ): 285 [M-H]<sup>-</sup>, 287 [M+H]<sup>+</sup>; <sup>1</sup>H-NMR (600 MHz, CD<sub>3</sub>OD)  $\delta$ : 7.48 (1H, d,  $J$  = 1.8 Hz, H-2'), 7.19 (1H, dd,  $J$  = 8.4, 1.8 Hz, H-6'), 6.83 (1H, d,  $J$  = 8.4 Hz, H-5'), 6.73 (1H, s, H-3), 6.57 (1H, br. s, H-8), 6.21 (1H, br. s, H-6); <sup>13</sup>C-NMR (150 MHz, CD<sub>3</sub>OD)  $\delta$ : 182.9 (C-4), 169.6 (C-7), 169.5 (C-2), 166.5 (C-5), 159.9 (C-9), 148.9 (C-4'), 147.9 (C-3'), 125.9 (C-1'), 125.7 (C-6'), 118.6 (C-5'), 116.6 (C-2'), 104.7 (C-10), 103.6 (C-3), 98.5 (C-6), 91.6 (C-8).

*Myricetin (27)*. Yellow powder;  $^1\text{H-NMR}$  (600 MHz,  $\text{CD}_3\text{OD}$ )  $\delta$ : 6.97 (2H, s, H-2', 6'), 6.49 (1H, s, H-8), 6.20 (1H, d,  $J = 1.8\text{ Hz}$ , H-6);  $^{13}\text{C-NMR}$  (150 MHz,  $\text{CD}_3\text{OD}$ )  $\delta$ : 182.8 (C-4), 169.7 (C-7), 169.5 (C-5), 159.9 (C-9), 148.0 (C-2), 147.0 (C-3', 5'), 137.2 (C-3), 136.5 (C-4'), 124.6 (C-1'), 111.8 (C-2', 6'), 104.7 (C-10), 99.3 (C-6), 91.6 (C-8).

*Kukulkanin B (28)*. Yellow solid; ESIMS ( $m/z$ ): 285  $[\text{M-H}]^-$ , 287  $[\text{M+H}]^+$ ;  $^1\text{H-NMR}$  (500 MHz,  $\text{CD}_3\text{OD}$ )  $\delta$ : 7.98 (1H, d,  $J = 9.5\text{ Hz}$ , H-6'), 7.96 (2H, d,  $J = 8.5\text{ Hz}$ , H-2, 6), 7.64 (1H, d,  $J = 16.0\text{ Hz}$ , H- $\beta$ ), 7.22 (1H, d,  $J = 9.0\text{ Hz}$ , H- $\alpha$ ), 6.88 (2H, d,  $J = 8.5\text{ Hz}$ , H-3, 5), 6.64 (1H, d,  $J = 9.0\text{ Hz}$ , H-5'), 3.84 (3H, s, 3'- $\text{OCH}_3$ );  $^{13}\text{C-NMR}$  (125 MHz,  $\text{CD}_3\text{OD}$ )  $\delta$ : 191.3 (C=O), 163.7 (C-4'), 150.8 (C-4), 149.9 (C-3'), 141.1 (C- $\beta$ ), 139.7 (C-2'), 132.2 (C-2, 6), 131.3 (C-6'), 121.5 (C-1), 120.5 (C- $\alpha$ ), 120.3 (C-3, 5), 116.4 (C-1'), 112.7 (C-5'), 61.8 (3'- $\text{OCH}_3$ ).

*4,4',6-Trihydroxyaurone (29)*. Yellow powder; ESIMS ( $m/z$ ): 269  $[\text{M-H}]^-$ , 271  $[\text{M+H}]^+$ ;  $^1\text{H-NMR}$  (500 MHz,  $\text{DMSO-}d_6$ )  $\delta$ : 10.83 (1H, s, OH), 10.79 (1H, s, OH), 10.00 (1H, s, OH), 7.74 (2H, d,  $J = 8.5\text{ Hz}$ , H-2', 6'), 6.85 (2H, d,  $J = 9.0\text{ Hz}$ , H-3', 5'), 6.53 (1H, s, -CH=), 6.19 (1H, d,  $J = 2.0\text{ Hz}$ , H-7), 6.05 (1H, d,  $J = 1.5\text{ Hz}$ , H-5);  $^{13}\text{C-NMR}$  (125 MHz,  $\text{DMSO-}d_6$ )  $\delta$ : 179.0 (C=O), 167.5 (C-4, 6), 158.7 (C-8), 158.1 (C-4'), 150.0 (C-2), 132.7 (C-2', 6'), 123.3 (C-1'), 115.9 (C-3', 5'), 109.0 (C-10), 102.8 (C-9), 97.6 (C-5), 90.4 (C-7).

*Aureusidin (30)*. Yellow powder; ESIMS ( $m/z$ ): 285  $[\text{M-H}]^-$ , 287  $[\text{M+H}]^+$ ;  $^1\text{H-NMR}$  (400 MHz,  $\text{CD}_3\text{OD}$ )  $\delta$ : 7.49 (1H, d,  $J = 1.2\text{ Hz}$ , H-2'), 7.21 (1H, dd,  $J = 8.0, 1.2\text{ Hz}$ , H-6'), 6.85 (1H, d,  $J = 8.0\text{ Hz}$ , H-5'), 6.59 (1H, s, -CH=), 6.22 (1H, br. s, H-5), 6.02 (1H, br. s, H-7);  $^{13}\text{C-NMR}$  (100 MHz,  $\text{CD}_3\text{OD}$ )  $\delta$ : 182.9 (C=O), 169.6 (C-6), 169.4 (C-4), 160.0 (C-8), 148.9 (C-4'), 147.9 (C-2), 146.6 (C-3'), 125.9 (C-1'), 125.8 (C-6'), 118.7 (C-2'), 116.6 (C-5'), 112.8 (C-10), 104.8 (C-9), 98.5 (C-7), 91.6 (C-5).

*(-)-Secoisolariciresinol (31)*. White powder;  $[\alpha]_D^{20} -35.1$  ( $c$  0.20, MeOH); ESIMS ( $m/z$ ): 385  $[\text{M+Na}]^+$ ;  $^1\text{H-NMR}$  (400 MHz,  $\text{CD}_3\text{OD}$ )  $\delta$ : 6.65 (2H, d,  $J = 8.0\text{ Hz}$ , H-5, 5'), 6.58 (2H, d,  $J = 1.6\text{ Hz}$ , H-2, 2'), 6.53 (2H, dd,  $J = 8.0, 2.0\text{ Hz}$ , H-6, 6'), 3.73 (6H, s, 3, 3'- $\text{OCH}_3$ ), 3.58 (4H, m, H-9, 9'), 2.54 (2H, dd,  $J = 13.6, 7.6\text{ Hz}$ , H-7, 7'), 2.66 (2H, dd,  $J = 13.6, 7.6\text{ Hz}$ , H-7, 7'), 1.90 (2H, m, H-8, 8');  $^{13}\text{C-NMR}$  (100 MHz,  $\text{DMSO-}d_6$ )  $\delta$ : 147.2 (C-3, 3'), 144.3 (C-4, 4'), 132.2 (C-1, 1'), 121.1 (C-6, 6'), 115.0 (C-5, 5'), 112.9 (C-2, 2'), 60.2 (C-9, 9'), 55.4 (3, 3'- $\text{OCH}_3$ ), 42.4 (C-8, 8'), 33.9 (C-7, 7').

*4-Ketopinoresinol (32)*. Colorless solid; ESIMS ( $m/z$ ): 371  $[\text{M-H}]^-$ , 395  $[\text{M+Na}]^+$ ;  $^1\text{H-NMR}$  (600 MHz,  $\text{CD}_3\text{OD}$ )  $\delta$ : 6.78–6.97 (6H, m, ArH), 5.39 (1H, d,  $J = 4.2\text{ Hz}$ , H-6), 5.23 (1H, d,  $J = 4.2\text{ Hz}$ , H-2), 4.29 (1H, dd,  $J = 9.6, 7.2\text{ Hz}$ , H-8'), 4.03 (1H, dd,  $J = 9.6, 4.8\text{ Hz}$ , H-8), 3.87 (6H, s,  $2 \times \text{OCH}_3$ ), 3.66 (2H, m, H-1, 5);  $^{13}\text{C-NMR}$  (150 MHz,  $\text{CD}_3\text{OD}$ )  $\delta$ : 179.9 (C-4), 149.6 (C-4''), 149.4 (C-4'), 148.4 (C-3''), 147.7 (C-3'), 133.4 (C-1''), 132.6 (C-1'), 119.9 (C-6''), 119.7 (C-6'), 116.6 (C-5''), 116.4 (C-5'), 110.8 (C-2''), 109.9 (C-2'), 85.3 (C-6), 82.6 (C-2), 74.0 (C-8), 56.7 ( $\text{OCH}_3$ ), 56.6 ( $\text{OCH}_3$ ), 51.2 (C-1), 46.8 (C-5).

*1,4-Bis(4-hydroxy-3,5-dimethoxyphenyl)-2,3-bis(hydroxymethyl)-1,4-butanediol (Smiglabranol) (33)*. Pale yellow solid; EIMS  $m/z$ : 418  $[\text{M-2H}_2\text{O}]^+$ , 319 (100), 210 (50), 226(41), 320(20), 436 (15);  $^1\text{H-NMR}$  (500 MHz,  $\text{CD}_3\text{OD}$ )  $\delta$ : 6.74 (4H, s, H-2, 2', 6, 6'), 4.95 (2H, d,  $J = 8.5\text{ Hz}$ , H-7, 7'), 3.86

(12H, s, 4 × -OCH<sub>3</sub>), 3.71 (2H, dd,  $J$  = 8.5, 2.5 Hz, H-9b, 9'b), 3.62 (2H, dd,  $J$  = 11.5, 5.0 Hz, H-9a, 9'a), 2.31 (2H, m, H-8, 8'); <sup>13</sup>C-NMR (125 MHz, CD<sub>3</sub>OD)  $\delta$ : 149.3 (C-3, 3', 5, 5'), 136.2 (C-1, 1'), 134.2 (C-4, 4'), 104.8 (C-2, 2', 6, 6'), 84.6 (C-7, 7'), 61.7 (C-9, 9'), 56.8 (C-8, 8'), 55.2 (3, 3'-OCH<sub>3</sub>).

(+)-*Lyoniresinol* (**34**). Colorless solid; ESIMS ( $m/z$ ): 419 [M-H]<sup>-</sup>, 443 [M+Na]<sup>+</sup>; <sup>1</sup>H-NMR (600 MHz, CD<sub>3</sub>OD)  $\delta$ : 6.59 (1H, s, H-6), 6.38 (2H, s, H-2', 6'), 4.31 (1H, d,  $J$  = 5.4 Hz, H-7'), 3.87 (3H, s, 5-OCH<sub>3</sub>), 3.74 (6H, s, 3', 5'-OCH<sub>3</sub>), 3.60 (2H, m, H-9b, 9b'), 3.50 (2H, d,  $J$  = 5.4 Hz, H-9a, 9a'), 3.38 (3H, s, 3-OCH<sub>3</sub>), 2.70 (1H, dd,  $J$  = 4.8, 15.0 Hz, H-7b), 2.57 (1H, dd,  $J$  = 11.4, 14.4 Hz, H-7a), 1.97 (1H, m, H-8'), 1.63 (1H, m, H-8); <sup>13</sup>C-NMR (150 MHz, CD<sub>3</sub>OD)  $\delta$ : 149.2 (C-3', 5'), 148.9 (C-5), 147.9 (C-3), 139.5 (C-4, 1'), 134.8 (C-4'), 130.4 (C-1), 126.5 (C-2), 108.0 (C-6), 107.1 (C-2', 6'), 67.0 (C-9), 64.4 (C-9'), 60.4 (3-OCH<sub>3</sub>), 57.0 (3', 5'-OCH<sub>3</sub>), 56.8 (5-OCH<sub>3</sub>), 49.8 (C-8'), 42.5 (C-7'), 41.1 (C-8), 33.8 (C-7).

*Kompasinol A* (**35**). Pale yellow solid; ESIMS ( $m/z$ ): 451 [M-H]<sup>-</sup>, 453 [M+H]<sup>+</sup>; <sup>1</sup>H-NMR (600 MHz, CD<sub>3</sub>OD)  $\delta$ : 6.85 (1H, d,  $J$  = 1.8 Hz, H-10), 6.78 (1H, d,  $J$  = 7.8 Hz, H-13), 6.75 (1H, dd,  $J$  = 7.8, 1.8 Hz, H-14), 6.33 (1H, s, H-2'), 6.33 (1H, s, H-6'), 6.24 (1H, d,  $J$  = 1.7 Hz, H-6), 6.19 (1H, d,  $J$  = 1.8 Hz, H-4), 4.65 (1H, d,  $J$  = 4.2 Hz, H-8), 4.47 (1H, dd,  $J$  = 8.4, 7.8 Hz, H-9'a), 4.13 (1H, br. s, H-7'), 3.77 (1H, m, H-7), 3.73 (6H, s, 3', 5'-OCH<sub>3</sub>), 3.54 (1H, t,  $J$  = 8.6 Hz, H-9'b), 3.04 (1H, ddd,  $J$  = 8.4, 8.4, 1.2 Hz, H-8'); <sup>13</sup>C-NMR (150 MHz, CD<sub>3</sub>OD)  $\delta$ : 160.5 (C-5), 156.3 (C-3), 149.1 (C-3', 5'), 148.5 (C-1), 146.5 (C-12), 146.0 (C-11), 137.9 (C-1'), 135.2 (C-9), 134.6 (C-4'), 123.0 (C-2), 119.1 (C-14), 116.3 (C-13), 114.5 (C-10), 105.4 (C-2', 6'), 103.2 (C-6), 102.8 (C-4), 89.4 (C-8), 75.0 (C-9'), 59.8 (C-7), 56.6 (3', 5'-OCH<sub>3</sub>), 56.5 (C-8'), 52.1 (C-7').

*Aiphanol* (**36**). Pale yellow powder; ESIMS ( $m/z$ ): 451 [M-H]<sup>-</sup>; <sup>1</sup>H-NMR (600 MHz, CD<sub>3</sub>OD)  $\delta$ : 7.09 (1H, s, H-8), 7.04 (1H, d,  $J$  = 8.4 Hz, H-6), 6.93 (1H, d,  $J$  = 15.0 Hz, H-10), 6.83 (1H, d,  $J$  = 16.2 Hz, H-9), 6.78 (1H, d,  $J$  = 8.0 Hz, H-5), 6.75 (2H, s, H-2'), 6.45 (2H, s, H-12), 6.17 (1H, s, H-14), 4.87 (1H, d,  $J$  = 8.0 Hz, H-2), 4.08 (1H, m, H-3), 3.87 (6H, s, 3', 5'-OCH<sub>3</sub>), 3.71 (1H, d,  $J$  = 12.0 Hz, CH<sub>2</sub>OH), 3.49 (1H, dd,  $J$  = 12.0, 4.2 Hz, CH<sub>2</sub>OH); <sup>13</sup>C-NMR (150 MHz, CD<sub>3</sub>OD)  $\delta$ : 159.7 (C-13), 149.4 (C-3'), 145.4 (C-8a), 144.7 (C-4a), 141.0 (C-11), 137.2 (C-4'), 132.5 (C-7), 129.0 (C-10), 128.6 (C-1'), 128.4 (C-9), 121.1 (C-6), 118.1 (C-5), 115.6 (C-8), 105.9 (C-2'), 105.9 (C-12), 102.9 (C-14), 80.1 (C-3), 78.0 (C-2), 62.1 (CH<sub>2</sub>OH), 56.8 (3', 5'-OCH<sub>3</sub>).

*Trans-resveratrol* (**37**). White powder; <sup>1</sup>H-NMR (600 MHz, CD<sub>3</sub>OD)  $\delta$ : 7.35 (2H, d,  $J$  = 8.4 Hz, H-2', 6'), 6.95 (1H, d,  $J$  = 16.2 Hz, H-8), 6.80 (1H, d,  $J$  = 16.8 Hz, H-7), 6.76 (2H, d,  $J$  = 8.4 Hz, H-3', 5'), 6.45 (2H, d,  $J$  = 1.8 Hz, H-2, 6), 6.16 (1H, t, H-4); <sup>13</sup>C-NMR (150 MHz, CD<sub>3</sub>OD)  $\delta$ : 159.6 (C-3, 5), 158.3 (C-4'), 141.3 (C-1), 130.4 (C-1'), 129.4 (C-2', 6'), 128.8 (C-8), 127.0 (C-7), 116.5 (C-3', 5'), 105.8 (C-2, 6), 102.6 (C-4).

*Trans-piceid* (**38**). White powder; ESIMS ( $m/z$ ): 413 [M+Na]<sup>+</sup>; <sup>1</sup>H-NMR (400 MHz, CD<sub>3</sub>OD)  $\delta$ : 7.36 (2H, d,  $J$  = 8.4 Hz, H-2', 6'), 7.01 (1H, d,  $J$  = 16.0 Hz, H-8), 6.84 (1H, d,  $J$  = 16.0 Hz, H-7), 6.77 (2H, d,  $J$  = 6.4 Hz, H-3', 5'), 6.74 (1H, t,  $J$  = 1.6 Hz, H-2), 6.60 (1H, t,  $J$  = 1.6 Hz, H-6), 6.44 (1H, t,  $J$  = 2.0 Hz, H-4), 4.82 (1H, d,  $J$  = 7.5 Hz, H-1'); <sup>13</sup>C-NMR (100 MHz, CD<sub>3</sub>OD)  $\delta$ : 160.5 (C-3), 159.6 (C-5), 158.5 (C-4'), 141.4 (C-1), 130.3 (C-1'), 129.9 (C-8), 128.9 (C-2', 6'), 126.7 (C-7), 116.5 (C-3', 5'), 108.3

(C-6), 106.9 (C-2), 104.0 (C-4), 102.4 (C-1'), 78.3 (C-3'), 78.1 (C-5'), 74.9 (C-2'), 71.5 (C-4'), 62.6 (C-6').

*Piceatannol* (**39**). Pale yellow solid; 243 [M-H]<sup>-</sup>; <sup>1</sup>H-NMR (400 MHz, CD<sub>3</sub>OD) δ: 6.99 (1H, d, *J* = 2.0 Hz, H-2), 6.93 (1H, d, *J* = 16.0 Hz, H-8), 6.85 (1H, dd, *J* = 8.0, 2.0 Hz, H-6), 6.78 (1H, d, *J* = 16.0 Hz, H-7), 6.75 (1H, d, *J* = 1.6 Hz, H-5), 6.46 (2H, d, *J* = 2.0 Hz, H-2', 6'), 6.18 (1H, t, *J* = 2.0 Hz, H-4'); <sup>13</sup>C-NMR (100 MHz, CD<sub>3</sub>OD) δ: 159.6 (C-3', 5'), 146.5 (C-3), 146.5 (C-4), 141.3 (C-1'), 131.1 (C-1), 129.7 (C-7), 127.0 (C-8), 120.2 (C-6), 116.5 (C-2), 113.9 (C-5), 105.8 (C-2', 6'), 102.7 (C-4').

*Trans-caffeic acid* (**40**). Pale yellow powder; <sup>1</sup>H-NMR (500 MHz, CD<sub>3</sub>OD) δ: 7.52 (1H, d, *J* = 15.5 Hz, H-7), 7.03 (1H, d, *J* = 2.0 Hz, H-2), 6.92 (1H, dd, *J* = 2.0, 8.0 Hz, H-6), 6.77 (1H, d, *J* = 8.5 Hz, H-5), 6.21 (1H, d, *J* = 16.0 Hz, H-8); <sup>13</sup>C-NMR (125 MHz, CD<sub>3</sub>OD) δ: 171.1 (COOH), 149.4 (C-4), 147.0 (C-7), 146.8 (C-3), 127.8 (C-1), 122.8 (C-6), 116.5 (C-5), 115.5 (C-8), 115.1 (C-2).

*5-O-Caffeoylshikimic acid* (**41**). Pale yellow solid; [α]<sub>D</sub><sup>20</sup> -97 (*c* 0.09, MeOH); ESIMS (*m/z*): 335 [M-H]<sup>-</sup>, 359 [M+Na]<sup>+</sup>; <sup>1</sup>H-NMR (600 MHz, CD<sub>3</sub>OD) δ: 7.56 (1H, d, *J* = 15.6 Hz, H-9), 7.04 (1H, d, *J* = 2.4 Hz, H-2'), 6.95 (1H, dd, *J* = 7.8, 1.8 Hz, H-6'), 6.86 (1H, m, H-2), 6.77 (1H, d, *J* = 7.8 Hz, H-5'), 6.28 (1H, d, *J* = 15.6 Hz, H-8), 5.24 (1H, dt, H-5), 4.40 (1H, br. t, H-3), 3.91 (1H, dd, *J* = 7.2, 4.2 Hz, H-4), 2.85 (1H, dd, *J* = 18.2, 5.0 Hz, H-6b), 2.31 (1H, dd, *J* = 18.2, 5.2 Hz, H-6a); <sup>13</sup>C-NMR (150 MHz, CD<sub>3</sub>OD) δ: 169.8 (COOH), 168.8 (C-7), 149.9 (C-4'), 147.5 (C-9), 147.0 (C-3'), 139.1 (C-2), 130.5 (C-1), 127.9 (C-1'), 123.2 (C-6'), 116.7 (C-5'), 115.4 (C-2'), 115.3 (C-8), 71.6 (C-5), 70.2 (C-4), 67.5 (C-3), 29.4 (C-6).

*3-O-p-Coumaroylshikimic acid* (**42**). Pale yellow solid; ESIMS (*m/z*): 319 [M-H]<sup>-</sup>, 343 [M+Na]<sup>+</sup>; <sup>1</sup>H-NMR (600 MHz, CD<sub>3</sub>OD) δ: 7.63 (1H, d, *J* = 15.6 Hz, H-8'), 7.47 (2H, br. d, *J* = 9.0 Hz, H-3', 5'), 6.81 (2H, br. d, *J* = 7.2 Hz, H-2', 6'), 6.75 (1H, s, H-2), 6.35 (1H, d, *J* = 15.6 Hz, H-7'), 5.28 (1H, br. s, H-3), 4.40 (1H, m, H-5), 3.91 (1H, dd, *J* = 6.5, 4.0 Hz, H-4), 2.86 (1H, dd, *J* = 18.0, 4.8 Hz, H-6b), 2.32 (1H, dd, *J* = 18.0, 5.4 Hz, H-6a); <sup>13</sup>C-NMR (150 MHz, CD<sub>3</sub>OD) δ: 168.6 (C-7, 9'), 161.3 (C-1'), 146.9 (C-7'), 134.5 (C-2), 133.6 (C-4'), 131.2 (C-3'/C-5'), 127.2 (C-1), 116.8 (C-3'/C-5'), 115.1 (C-8'), 71.4 (C-4), 70.1 (C-5), 67.4 (C-3), 29.4 (C-6).

*(2S)-1,2-O-Di-trans-p-coumaroylglycerol (Smiglycerol)* (**43**). Pale yellow powder; mp 183–185 °C; [α]<sub>D</sub><sup>20</sup> +164.7 (*c* 0.17, MeOH); CD (3.02 × 10<sup>-4</sup> MeOH): Δε(nm) -6.68 (287), +5.04 (326); UV λ<sub>max</sub> (MeOH): 210, 228, 310 nm; IR ν<sub>max</sub><sup>KBr</sup> cm<sup>-1</sup>: 3448, 2926, 1686, 1634, 1516, 1438, 1342, 1287, 1150, 1052, 829; HR-ESI-MS *m/z*: 383.1133 [M-H]<sup>-</sup> (calcd. for C<sub>21</sub>H<sub>19</sub>O<sub>7</sub> 383.1131); 407.1103 [M+Na]<sup>+</sup> (calcd. for C<sub>21</sub>H<sub>20</sub>O<sub>7</sub>Na 407.1107); <sup>1</sup>H-NMR (600 MHz, DMSO-*d*<sub>6</sub>) δ: 10.02 (2H, s, -OH), 7.57 (1H, d, *J* = 16.2 Hz, H-6), 7.541 (2H, d, *J* = 8.4 Hz, H-8, 12), 7.540 (1H, d, *J* = 15.6 Hz, H-3'), 7.53 (2H, d, *J* = 8.4 Hz, H-5', 9'), 6.77 (2H, d, *J* = 8.4 Hz, H-9, 11), 6.76 (2H, d, *J* = 8.4 Hz, H-6', 8'), 6.39 (1H, d, *J* = 16.2 Hz, H-5), 6.38 (1H, d, *J* = 15.6 Hz, H-2'), 5.11 (1H, m, H-2), 4.40 (1H, dd, *J* = 11.4, 3.0 Hz, H-1a), 4.25 (1H, dd, *J* = 12.0, 6.6 Hz, H-1b), 3.60 (2H, t, H-3a, H-3b); <sup>13</sup>C-NMR (150 MHz, DMSO-*d*<sub>6</sub>) δ: 166.41 (C-1'), 166.19 (C-4), 159.92 (C-10), 159.89 (C-7'), 145.21 (C-6), 145.16 (C-3'), 130.44 (C-8, 12),

130.40 (C-5',9'), 125.02 (C-4'), 124.97 (C-7), 115.77 (C-9,11), 115.75 (C-6',8'), 114.03 (C-5), 113.68 (C-2'), 72.13 (C-2), 62.54 (C-1), 59.67(C-3).

*Juncusyl ester B (44)*. White powder; ESIMS ( $m/z$ ): 237 [M-H]<sup>-</sup>; <sup>1</sup>H-NMR (600 MHz, CD<sub>3</sub>OD)  $\delta$ : 7.67 (1H, d,  $J$  = 16.2 Hz, H-6), 7.46 (2H, d,  $J$  = 8.4 Hz, H-8, 12), 6.81 (2H, d,  $J$  = 9.0 Hz, H-9, 11), 6.37 (1H, d,  $J$  = 15.6 Hz, H-5), 4.99 (1H, m, H-2), 3.75 (4H, m, H-3), 3.75 (4H, m, H-1); <sup>13</sup>C-NMR (150 MHz, CD<sub>3</sub>OD)  $\delta$ : 168.9 (C-4), 161.2 (C-12), 146.6 (C-6), 131.1 (C-8), 131.1 (C-10), 127.2 (C-7), 116.8 (C-9), 116.8 (C-11), 115.4 (C-5), 76.6 (C-2), 61.7 (C-1), 61.7(C-3).

*1-O-p-Coumaroylglycerol (45)*. Colorless solid; ESIMS ( $m/z$ ): 237 [M-H]<sup>-</sup>, 261 [M+Na]<sup>+</sup>; <sup>1</sup>H-NMR (600 MHz, CD<sub>3</sub>OD)  $\delta$ : 7.66 (1H, d,  $J$  = 16.2 Hz, H-7'), 7.46 (2H, d,  $J$  = 9.5 Hz, H-2', 6'), 6.81 (2H, d,  $J$  = 9.0 Hz, H-3', 5'), 6.36 (1H, d,  $J$  = 15.6 Hz, H-8'), 4.26 (1H, dd,  $J$  = 11.4, 4.2 Hz, H-1a), 4.17 (1H, dd,  $J$  = 11.4, 6.6 Hz, H-1b), 3.90 (1H,  $J$  = 6.0 Hz, H-2), 3.61 (2H, d,  $J$  = 5.4 Hz, H-3); <sup>13</sup>C-NMR (150 MHz, CD<sub>3</sub>OD)  $\delta$ : 169.2 (C-9'), 161.3 (C-4'), 145.3 (C-7'), 131.2 (C-2'), 131.2 (C-6'), 127.2 (C-1'), 116.4 (C-3'), 116.4 (C-5'), 115.8 (C-8'), 71.3 (C-2), 66.6 (C-1), 64.1 (C-3).

*Vanillin (46)*. Pale yellow oil; <sup>1</sup>H-NMR (500 MHz, CD<sub>3</sub>OD)  $\delta$ : 9.71 (1H, s, H-7), 7.42 (1H, s, H-2), 7.41 (1H, d,  $J$  = 7.0 Hz, H-6), 6.90 (1H, d,  $J$  = 7.5 Hz, H-5), 3.90 (3H, s, OCH<sub>3</sub>); <sup>13</sup>C-NMR (125 MHz, CD<sub>3</sub>OD)  $\delta$ : 192.7 (C-7), 156.0 (C-4), 150.0 (C-3), 130.1 (C-1), 128.3 (C-6), 116.6 (C-5), 111.1 (C-2), 56.3 (OCH<sub>3</sub>).

*p-Hydroxy-benzaldehyde (47)*. Pale yellow powder; <sup>1</sup>H-NMR (500 MHz, CD<sub>3</sub>OD)  $\delta$ : 9.75 (1H, s, CHO), 7.76 (2H, d,  $J$  = 8.8 Hz, H-2, 6), 6.89 (2H, d,  $J$  = 8.4 Hz, H-3, 5); <sup>13</sup>C-NMR (125 MHz, CD<sub>3</sub>OD)  $\delta$ : 192.8 (CHO), 165.4 (C-4), 133.4 (C-2, 6), 130.2 (C-1), 116.9 (C-3, 5).

*Acetovanillone (48)*. White powder; EIMS ( $m/z$ ): 166 [M]<sup>+</sup>; <sup>1</sup>H-NMR (600 MHz, DMSO-*d*<sub>6</sub>)  $\delta$ : 7.50 (1H, dd,  $J$  = 1.8, 8.4 Hz, H-6), 7.43 (1H, d,  $J$  = 1.8 Hz, H-2), 6.86 (1H, d,  $J$  = 8.4 Hz, H-5), 3.82 (3H, s, OCH<sub>3</sub>), 2.50 (3H, s, H-8); <sup>13</sup>C-NMR (150 MHz, DMSO-*d*<sub>6</sub>)  $\delta$ : 196.0 (C-7), 153.8 (C-4), 147.5 (C-3), 128.8 (C-1), 123.4 (C-6), 114.9 (C-5), 111.1 (C-2), 55.6 (OCH<sub>3</sub>), 26.2(C-8).

*(+)-Scytalone (49)*. Pale yellow powder; [ $\alpha$ ]<sub>D</sub><sup>20</sup> +10.6 ( $c$  0.08, MeOH); <sup>1</sup>H-NMR (400 MHz, CD<sub>3</sub>OD)  $\delta$ : 6.22 (1H, br. s, H-5), 6.09 (1H, br. s, H-7), 4.25 (1H, m, H-3), 3.07 (1H, d,  $J$  = 16.0 Hz, H-4a), 2.84 (1H, d,  $J$  = 16.0 Hz, H-4b), 2.84 (1H, dd,  $J$  = 16.8, 3.2 Hz, H-2a), 2.61 (1H, dd,  $J$  = 17.2, 7.6 Hz, H-2b), <sup>13</sup>C-NMR (100 MHz, CD<sub>3</sub>OD)  $\delta$ : 202.4 (C-1), 166.7 (C-6), 166.5 (C-8), 146.0 (C-10), 111.7 (C-9), 109.4 (C-5), 101.7 (C-7), 66.9 (C-3), 47.4 (C-2), 39.2 (C-4).

*Glucosyringic acid (50)*. White powder; <sup>1</sup>H-NMR (500 MHz, DMSO-*d*<sub>6</sub>)  $\delta$ : 12.87 (1H, s, COOH), 7.23 (2H, s, H-2, 6), 5.11 (1H, d,  $J$  = 7.5 Hz, H-1'), 3.79 (6H, s, 2  $\times$  OCH<sub>3</sub>); <sup>13</sup>C-NMR (125 MHz, DMSO-*d*<sub>6</sub>)  $\delta$ : 166.9 (C-7), 152.2 (C-3, 5), 138.2 (C-4), 125.6 (C-1), 107.3 (C-2, 6), 101.9 (C-1'), 77.4 (C-5'), 76.6 (C-3'), 74.1 (C-2'), 69.8 (C-4'), 60.8 (C-6'), 56.3(2  $\times$  OCH<sub>3</sub>).

*Protocatechuic acid (51)*. White powder; EIMS  $m/z$ : 154 (M<sup>+</sup>); <sup>1</sup>H-NMR (600 MHz, CD<sub>3</sub>OD)  $\delta$ : 7.43 (1H, s, H-2), 7.41 (1H, s, H-6), 6.79 (1H, d,  $J$  = 7.8 Hz, H-5); <sup>13</sup>C-NMR (150 MHz, CD<sub>3</sub>OD)  $\delta$ : 170.3 (COOH), 151.5 (C-4), 146.1 (C-3), 123.9 (C-6), 123.2 (C-3), 117.7 (C-2), 115.7(C-5).

*3-Methoxygallic acid (52)*. White powder;  $^1\text{H-NMR}$  (500 MHz,  $\text{CD}_3\text{OD}$ )  $\delta$ : 7.18 (2H, s, H-2, 6), 3.86 (3H, s,  $\text{OCH}_3$ );  $^{13}\text{C-NMR}$  (125 MHz,  $\text{CD}_3\text{OD}$ )  $\delta$ : 170.2 (COOH), 149.1 (C-5), 146.2 (C-3), 140.4 (C-4), 122.0 (C-1), 112.2 (C-6), 106.3 (C-2), 56.6 ( $\text{OCH}_3$ ).

*Vanillic acid 1-O- $\beta$ -D-glucopyranosyl ester (53)*. Pale yellow oil;  $[\alpha]_{\text{D}}^{20}$  -16.5 (c0.07, MeOH);  $^1\text{H-NMR}$  (500 MHz,  $\text{CD}_3\text{OD}$ )  $\delta$ : 7.63 (1H, dd,  $J$  = 8.0, 2.0 Hz, H-6), 7.61 (1H, d,  $J$  = 2.0 Hz, H-2), 7.20 (1H, d,  $J$  = 8.5 Hz, H-5), 5.02 (1H, d,  $J$  = 7.5 Hz, GlcH-1'), 3.90 (3H, s,  $\text{OCH}_3$ ), 3.68 (1H, dd,  $J$  = 12.0, 5.4 Hz, GlcH-6'), 3.54-3.38 (4H, m, GlcH-2', 3', 4', 5');  $^{13}\text{C-NMR}$  (125 MHz,  $\text{CD}_3\text{OD}$ )  $\delta$ : 169.5 (C-7), 152.0 (C-4), 150.4 (C-3), 126.0 (C-6), 124.8 (C-1), 116.4 (C-5), 114.4 (C-2), 101.9 (C-1'), 77.9 (C-5'), 78.3 (C-3'), 74.8 (C-2'), 71.3 (C-4'), 62.4 (C-6'), 56.6 ( $\text{OCH}_3$ ).

*Hydroxytyrosol (54)*. Pale yellow solid;  $^1\text{H-NMR}$  (600 MHz,  $\text{CD}_3\text{OD}$ )  $\delta$ : 6.67 (1H, d,  $J$  = 8.4 Hz, H-5), 6.65 (1H, d,  $J$  = 2.4 Hz, H-2), 6.52 (1H, dd,  $J$  = 8.4, 2.4 Hz, H-6), 3.67 (2H, t,  $J$  = 7.2 Hz, H-2'), 2.66 (2H, t,  $J$  = 7.2 Hz, H-1');  $^{13}\text{C-NMR}$  (150 MHz,  $\text{CD}_3\text{OD}$ )  $\delta$ : 146.1 (C-3), 144.6 (C-4), 131.8 (C-1), 121.2 (C-6), 117.1 (C-5), 116.3 (C-2), 64.6 (C-2'), 39.7 (C-1').

*Acetyl-11-keto- $\beta$ -boswellic acid (55)*. Pale yellow solid; EIMS  $m/z$ : 512 (4)  $[\text{M}]^+$ , 232 (100), 408 (53), 273 (45), 393 (28);  $^1\text{H-NMR}$  (500 MHz,  $\text{CDCl}_3$ )  $\delta$ : 5.56 (1H, s, H-12), 5.31 (1H, t,  $J$  = 2.5 Hz, H-3), 2.42 (1H, s, H-9), 2.09 (3H, s,  $\text{CH}_3\text{CO}$ ), 1.35 (3H, s,  $\text{CH}_3$ -23), 1.24 (3H, s,  $\text{CH}_3$ -27), 1.20 (3H, s,  $\text{CH}_3$ -26), 1.15 (3H, s,  $\text{CH}_3$ -25), 0.95 (3H, s,  $\text{CH}_3$ -30), 0.83 (3H, s,  $\text{CH}_3$ -28), 0.81 (3H, d,  $J$  = 6.5 Hz,  $\text{CH}_3$ -29);  $^{13}\text{C-NMR}$  (125 MHz,  $\text{CD}_3\text{OD}$ )  $\delta$ : 201.6 (C-11), 179.6 (C-24), 172.3 ( $\text{COCH}_3$ ), 167.9 (C-13), 131.2 (C-12), 74.9 (C-3), 61.7 (C-9), 60.5 (C-18), 51.5 (C-5), 46.4 (C-4), 45.1 (C-14), 42.0 (C-8), 40.6 (C-22), 40.5 (C-19), 40.4 (C-20), 38.6 (C-10), 35.8 (C-1), 35.1 (C-17), 33.9 (C-7), 30.8 (C-21), 29.4 (C-28), 28.6 (C-15), 28.3 (C-16), 24.5 (C-23), 24.4 (C-2), 21.5 ( $\text{COCH}_3$ ), 21.1 (C-27), 20.8 (C-30), 20.1 (C-6), 18.9 (C-26), 17.8 (C-29), 14.4 (C-25).

*Stigmasterol (56)*. White powder;  $^1\text{H-NMR}$  (500 MHz,  $\text{CDCl}_3$ )  $\delta$ : 5.35 (1H, br d,  $J$  = 5.5 Hz, H-6), 5.15 (1H, dd,  $J$  = 8.5, 15.5 Hz, H-22), 5.02 (1H, dd,  $J$  = 8.5 Hz, H-23), 3.52 (1H, m, H-3), 0.93 (3H, d,  $J$  = 6.0 Hz, H-21), 0.86 (3H, t,  $J$  = 7.0 Hz, H-29), 0.84 (3H, d,  $J$  = 7.5 Hz, H-26), 0.82 (3H, d,  $J$  = 7.5 Hz, H-27), 0.80 (3H, s, H-19), 0.68 (3H, s, H-18);  $^{13}\text{C-NMR}$  (125 MHz,  $\text{CDCl}_3$ )  $\delta$ : 140.8 (C-5), 138.3 (C-22), 129.3 (C-23), 121.7 (C-6), 71.8 (C-3), 56.9 (C-17), 55.9 (C-14), 51.2 (C-24), 50.2 (C-9), 42.2 (C-13), 40.5 (C-20), 39.7 (C-4), 39.7 (C-12), 36.5 (C-10), 33.2 (C-25), 31.9 (C-2), 31.9 (C-7), 31.9 (C-8), 31.7 (C-1), 28.9 (C-16), 25.4 (C-28), 24.4 (C-15), 21.2 (C-11), 21.1 (C-21), 21.1 (C-27), 19.4 (C-19), 19.0 (C-26), 12.2 (C-29), 12.0 (C-18).

*$\beta$ -Sitosterol (57)*. White powder;  $^1\text{H-NMR}$  (400 MHz,  $\text{CDCl}_3$ )  $\delta$ : 5.35 (1H, br d,  $J$  = 5.2 Hz, H-6), 3.55 (1H, m, H-3), 1.00 (3H, s, 19- $\text{CH}_3$ ), 0.93 (3H, d,  $J$  = 8.0 Hz, 21- $\text{CH}_3$ ), 0.91 (3H, d,  $J$  = 8.0 Hz, 29- $\text{CH}_3$ ), 0.86 (3H, d,  $J$  = 7.6 Hz, 26- $\text{CH}_3$ ), 0.84 (3H, d,  $J$  = 7.6 Hz, 27- $\text{CH}_3$ ), 0.79 (3H, s, 18- $\text{CH}_3$ );  $^{13}\text{C-NMR}$  (100 MHz,  $\text{CDCl}_3$ )  $\delta$ : 140.8 (C-5), 121.7 (C-6), 71.8 (C-3), 56.8 (C-14), 56.1 (C-17), 50.1 (C-9), 45.8 (C-4), 42.3 (C-13), 39.7 (C-12), 37.3 (C-1), 36.5 (C-10), 36.1 (C-20), 34.0 (C-22), 31.9 (C-8), 31.7 (C-7), 29.2 (C-2), 28.2 (C-25), 26.1 (C-15), 24.3 (C-23), 23.1 (C-28), 21.1 (C-11), 19.8 (C-26), 19.4 (C-19), 19.0 (C-21), 18.8 (C-27), 12.0 (C-29), 11.9 (C-18).

*Daucosterol* (**58**). White powder;  $^1\text{H-NMR}$  (400 MHz,  $\text{C}_5\text{D}_5\text{N}$ )  $\delta$ : 5.34 (1H, m, H-6), 5.06 (1H, d,  $J = 7.6$  Hz, Glc H-1');  $^{13}\text{C-NMR}$  (100 MHz,  $\text{C}_5\text{D}_5\text{N}$ )  $\delta$ : 140.9 (C-5), 121.9 (C-6), 102.6 (Glc C-1'), 78.6 (C-3), 78.5 (Glc C-3'), 78.1 (Glc C-5'), 75.3 (Glc C-2'), 71.7 (Glc C-4'), 62.9 (Glc C-6'), 56.8 (C-14), 56.3 (C-17), 50.4 (C-9), 46.1 (C-24), 42.5 (C-13), 40.0 (C-4), 39.4 (C-12), 37.5 (C-1), 36.9 (C-20), 36.4 (C-10), 34.2 (C-22), 32.2 (C-8), 32.1 (C-7), 30.3 (C-2), 29.5 (C-25), 28.6 (C-16), 26.4 (C-23), 24.5 (C-15), 23.4 (C-28), 21.3 (C-11), 20.0 (C-27), 19.4 (C-19), 19.2 (C-26), 19.0 (C-21), 12.2 (C-18), 12.0 (C-29).

*Smilagenin* (**59**). White powder; ESIMS ( $m/z$ ): 339  $[\text{M-H}]^-$ , 363  $[\text{M+Na}]^+$ ;  $^1\text{H-NMR}$  (500 MHz,  $\text{CD}_3\text{OD}$ )  $\delta$ : 8.09 (1H, s, H-2), 6.32 (1H, d,  $J = 2.0$  Hz, H-8), 6.20 (1H, d,  $J = 2.0$  Hz, H-6), 5.31 (1H, d,  $J = 1.5$  Hz, H-1'), 3.82 (1H, dd,  $J = 3.5, 9.5$  Hz, H-2'), 3.76 (1H, dq,  $J = 9.0, 6.0$  Hz, H-5'), 3.44 (1H, dd,  $J = 1.5, 9.5$  Hz, H-3'), 3.30 (1H, s, H-4'), 1.27 (3H, d,  $J = 6.0$  Hz, H-6');  $^{13}\text{C-NMR}$  (125 MHz,  $\text{CD}_3\text{OD}$ )  $\delta$ : 178.7 (C-4), 166.5 (C-7), 163.5 (C-5), 159.3 (C-9), 147.9 (C-2), 140.4 (C-3), 106.4 (C-10), 102.1 (C-1'), 100.1 (C-6), 95.0 (C-8), 73.5 (C-4'), 71.9 (C-3'), 71.6 (C-2'), 71.2 (C-5'), 18.0 (C-6').

*5-Hydroxymaltol* (**60**). White powder; EIMS  $m/z$ : 142  $[\text{M}]^+$ ;  $^1\text{H-NMR}$  (600 MHz,  $\text{CD}_3\text{OD}$ )  $\delta$ : 7.85 (1H, s, H-2), 2.32 (3H, s,  $\text{CH}_3$ );  $^{13}\text{C-NMR}$  (150 MHz,  $\text{CD}_3\text{OD}$ )  $\delta$ : 170.3 (C-4), 151.8 (C-3), 145.8 (C-6), 142.9 (C-5), 140.4 (C-2), 14.5 ( $\text{CH}_3$ ).

*5-Hydroxyuridine* (**61**). Pale yellow solid;  $^1\text{H-NMR}$  (500 MHz,  $\text{DMSO}-d_6$ )  $\delta$ : 8.11 (1H, d,  $J = 8.5$  Hz, H-6), 5.90 (1H, d,  $J = 6.0$  Hz, H-1'), 5.74 (1H, d,  $J = 6.5$  Hz, H-5), 5.40 (1H, d,  $J = 5.6$  Hz), 5.13 (1H, d,  $J = 4.8$  Hz), 5.11 (1H, d,  $J = 4.8$  Hz), 4.55 (1H, d,  $J = 5.0$  Hz, H-2'), 4.14 (1H, t,  $J = 8.5$  Hz, H-3'), 3.97 (1H, d,  $J = 4.0$  Hz, H-4'), 3.67 (1H, m, H-5'a), 3.56 (1H, m, H-5'e);  $^{13}\text{C-NMR}$  (125 MHz,  $\text{DMSO}-d_6$ )  $\delta$ : 158.7 (C-4), 149.1 (C-2), 140.9 (C-6), 101.7 (C-5), 87.8 (C-1'), 85.9 (C-4'), 73.8 (C-3'), 70.4 (C-2'), 61.3 (C-5').

*2-Methyl butanedioic acid-4-ethyl ester* (**62**). Pale yellow oil;  $^1\text{H-NMR}$  (500 MHz,  $\text{CD}_3\text{OD}$ )  $\delta$ : 4.11 (2H, dd,  $J = 8.5, 5.5$  Hz, H-6), 2.85 (1H, m, H-2), 2.64 (1H, dd,  $J = 17.0, 8.5$  Hz, H-3b), 2.41 (1H, dd,  $J = 16.5, 5.5$  Hz, H-3a), 1.23 (3H, t,  $J = 7.0$  Hz, H-7), 1.20 (3H, d,  $J = 7.5$  Hz, H-5);  $^{13}\text{C-NMR}$  (125 MHz,  $\text{CD}_3\text{OD}$ )  $\delta$ : 179.1 (C-1), 173.8 (C-4), 61.6 (C-6), 38.7 (C-3), 37.5 (C-2), 17.5 (C-5), 14.5 (C-7).

*Isoselachoceric acid* (**63**). Pale yellow powder; EIMS  $m/z$  (%): 368 ( $\text{M}^+$ );  $^1\text{H-NMR}$  (400 MHz,  $\text{CDCl}_3$ )  $\delta$ : 2.36 (2H, t,  $J = 7.2$  Hz, H-2), 1.63 (2H, m, H-3), 1.27 ( $19 \times \text{CH}_2$ , 38H, br. s), 0.87 (3H, t,  $J = 7.0$  Hz, H-24).

**Figure S1.** Structures of the investigated flavan-3-ols (**1**, **20–22**).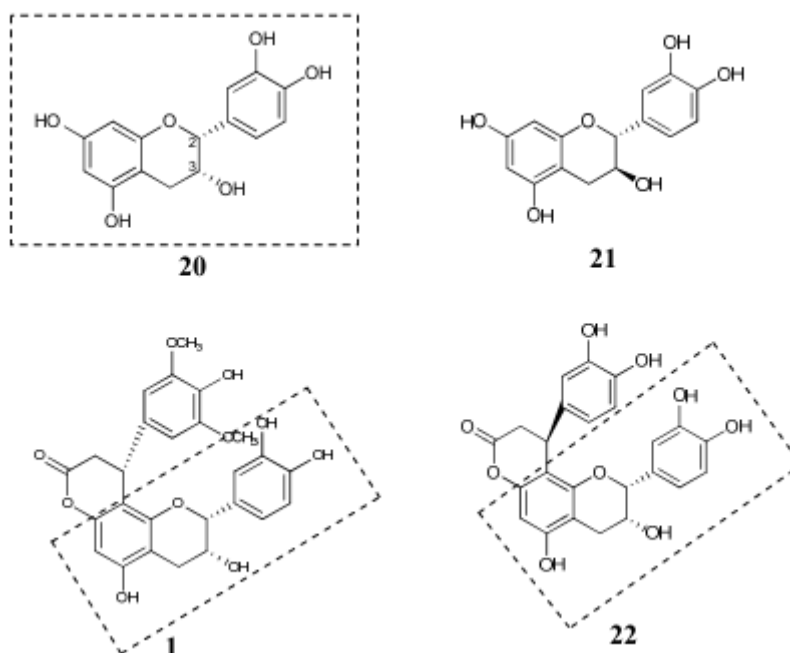**Table S1.** MIC values of investigated flavan-3-ols (**1**, **20–22**) against the microorganisms tested.

| Compound  | Microorganisms (MICs, mM)                            |
|-----------|------------------------------------------------------|
| <b>1</b>  | EC, PA, KP (0.604); MRSA, SA, EF (0.302); CA (0.146) |
| <b>20</b> | MRSA, EF (1.03); SA (0.517)                          |
| <b>21</b> | >2.07                                                |
| <b>22</b> | PA (0.663); MRSA, SA (0.0801); EF, CA (0.160)        |

**Figure S2.** Flavanone skeletons of compounds **7**, **11–14**.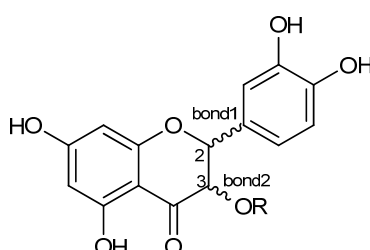**Table S2.** MIC values of investigated flavanones (**7**, **11–14**) against the microorganisms tested.

| Compound  | R   | Bond 1 | Bond 2 | Microorganisms (MICs, mM)                   |
|-----------|-----|--------|--------|---------------------------------------------|
| <b>7</b>  | H   | .....  | ▶      | >1.97                                       |
| <b>11</b> | Rha | .....  | .....  | >1.33                                       |
| <b>12</b> | Rha | .....  | ▶      | CA (0.666)                                  |
| <b>13</b> | Rha | ▶      | .....  | MRSA(1.33)                                  |
| <b>14</b> | Rha | ▶      | ▶      | SA (0.666); EC, PA, KP, MRSA, EF, CA (1.33) |

**Figure S3.** Flavanone skeletons of compounds **9**, **15–17**.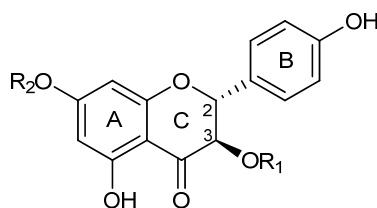**Table S3.** MIC values of investigated flavanones (**9**, **15–17**) against the microorganisms tested.

| Compound  | R <sub>1</sub> | R <sub>2</sub> | Microorganisms (MICs, mM) |
|-----------|----------------|----------------|---------------------------|
| <b>9</b>  | H              | H              | MRSA, SA (2.10)           |
| <b>15</b> | Rha            | H              | >1.38                     |
| <b>16</b> | Glc            | H              | >1.33                     |
| <b>17</b> | H              | Glc            | MRSA, SA, EF (1.33)       |

**Figure S4.** Stibene skeletons of compounds **37** and **38**.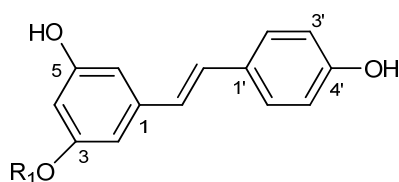**Figure S5.** Stibene skeletons of compounds **4** and **39**.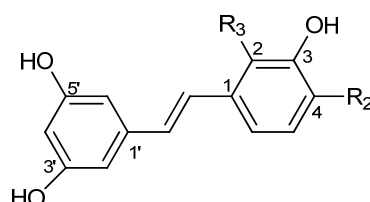**Table S4.** MIC values of investigated stibenes (**4**, **37–39**) against the microorganisms tested.

| Compound  | R <sub>1</sub> | R <sub>2</sub> | R <sub>3</sub> | Microorganisms (MICs, mM)                                   |
|-----------|----------------|----------------|----------------|-------------------------------------------------------------|
| <b>37</b> | H              | -              | -              | MRSA, EF (0.159); SA (0.0794); CA (0.657)                   |
| <b>38</b> | Glc            | -              | -              | MRSA, SA (0.768); EF (1.54)                                 |
| <b>4</b>  | -              | H              | OH             | EC, PA, KP (1.64); MRSA (0.409); SA (0.205); EF, CA (0.819) |
| <b>39</b> | -              | OH             | H              | EC, PA, KP (1.64); MRSA (0.409); SA (0.205); CA (0.819)     |

EC, *Escherichia coli*; PA, *Pseudomonas aeruginosa* PA01; KP, *Klebsiella pneumonia*(clinical isolate); MRSA, methicillin-resistant *Staphylococcus aureus*(clinical isolate); SA, *Staphylococcus aureus* ATCC6538; EF, *Enterococcus faecalis*; CA, *Candida albicans* SC5314.
